# Supplementary material
Source: Springer Nature journal article supplement (https://www.springermedizin.de/resource/supplementary/12936_2013_2808_MOESM3_ESM.pdf/9544316)
Supplement: MOESM3 [file 9544316]

982 women followed-up

*Pf* positive samples from 212 women were analyzed for *pfdhfr/pfdhps* and *msp1/2* genotyping

107 paired blood samples fulfilled the criteria for assessment of drug efficacy

62 pairs of pre- and post-treatment infections were compared to identify recrudescence

836 samples at delivery
